# Supplementary material
Source: Research Square preprint supplement (doi:10.21203/rs.3.rs-9157937/v1)
Supplement: Supplementary file 1 [file 7c082e8a400b40ffdd71d1c0.xlsx]

## Sheet: Sheet1
选择集	分块	选项	气候康养适配度	景观疗愈价值	医养服务可及性	设施适老化水平	文化沉浸深度	成本可负担
1	1	OptionA	0	2	2	2	0	0
1	1	OptionB	2	0	0	0	2	2
1	1	StatusQuo	0	0	0	1	0	1
1	1	NoChoice
2	1	OptionA	1	2	2	1	0	2
2	1	OptionB	1	0	0	1	2	0
2	1	StatusQuo	0	0	0	1	0	1
2	1	NoChoice
3	1	OptionA	0	0	2	0	2	2
3	1	OptionB	2	2	0	2	0	0
3	1	StatusQuo	0	0	0	1	0	1
3	1	NoChoice
4	1	OptionA	0	2	0	2	2	2
4	1	OptionB	2	0	2	0	0	0
4	1	StatusQuo	0	0	0	1	0	1
4	1	NoChoice
5	1	OptionA	2	1	0	2	1	2
5	1	OptionB	0	1	2	0	1	0
5	1	StatusQuo	0	0	0	1	0	1
5	1	NoChoice
6	1	OptionA	1	1	1	0	2	1
6	1	OptionB	1	1	1	2	0	1
6	1	StatusQuo	0	0	0	1	0	1
6	1	NoChoice
7	2	OptionA	0	0	2	1	2	1
7	2	OptionB	2	2	0	1	0	1
7	2	StatusQuo	0	0	0	1	0	1
7	2	NoChoice
8	2	OptionA	0	2	0	0	1	1
8	2	OptionB	2	0	2	2	1	1
8	2	StatusQuo	0	0	0	1	0	1
8	2	NoChoice
9	2	OptionA	1	2	1	1	0	2
9	2	OptionB	1	0	1	1	2	0
9	2	StatusQuo	0	0	0	1	0	1
9	2	NoChoice
10	2	OptionA	1	1	2	2	0	1
10	2	OptionB	1	1	0	0	2	1
10	2	StatusQuo	0	0	0	1	0	1
10	2	NoChoice
11	2	OptionA	2	0	1	1	1	1
11	2	OptionB	0	2	1	1	1	1
11	2	StatusQuo	0	0	0	1	0	1
11	2	NoChoice
12	2	OptionA	1	1	0	2	2	0
12	2	OptionB	1	1	2	0	0	2
12	2	StatusQuo	0	0	0	1	0	1
12	2	NoChoice
13	3	OptionA	1	0	2	0	0	0
13	3	OptionB	1	2	0	2	2	2
13	3	StatusQuo	0	0	0	1	0	1
13	3	NoChoice
14	3	OptionA	2	1	0	0	1	1
14	3	OptionB	0	1	2	2	1	1
14	3	StatusQuo	0	0	0	1	0	1
14	3	NoChoice
15	3	OptionA	2	2	0	0	0	0
15	3	OptionB	0	0	2	2	2	2
15	3	StatusQuo	0	0	0	1	0	1
15	3	NoChoice
16	3	OptionA	2	0	1	1	1	2
16	3	OptionB	0	2	1	1	1	0
16	3	StatusQuo	0	0	0	1	0	1
16	3	NoChoice
17	3	OptionA	0	1	1	1	2	0
17	3	OptionB	2	1	1	1	0	2
17	3	StatusQuo	0	0	0	1	0	1
17	3	NoChoice
18	3	OptionA	2	0	1	2	1	0
18	3	OptionB	0	2	1	0	1	2
18	3	StatusQuo	0	0	0	1	0	1
18	3	NoChoice
